# Supplementary material for: Can video playback provide social information for foraging blue tits?
Source: PeerJ. 2017 Mar 21;5:e3062. doi: 10.7717/peerj.3062 (PMC5363260; doi:10.7717/peerj.3062)
Supplement: Data S1 [file peerj-05-3062-s005.xlsx]

## Sheet: behaviours during videos
BirdID	info.test	cup.demonstrator	flying	facing	head.turns	hops	total.time.visible	association	interactions	first.test	demonstratorID	demonstrator.video
1	positive	cup.before	0	11	6	0	11	0	0	positive	2	2_positive
1	positive	cup.after	3	9	6	0	13	0	0	positive	2	2_positive
1	positive	demonstrator	3	19	15	2	24	0	0	positive	2	2_positive
1	negative	cup.before	0	20	7	0	20	0	0	positive	2	2_negative
1	negative	cup.after	0	30	7	0	30	0	0	positive	2	2_negative
1	negative	demonstrator	0	45	20	0	45	0	0	positive	2	2_negative
3	positive	cup.before	0	30	3	0	30	0.0292841648590022	27	positive	2	2_positive
3	positive	cup.after	0	30	5	0	30	0.0292841648590022	27	positive	2	2_positive
3	positive	demonstrator	0	45	5	0	45	0.0292841648590022	27	positive	2	2_positive
3	negative	cup.before	0	9	2	0	9	0.0292841648590022	27	positive	2	2_negative
3	negative	cup.after	10	13	3	0	25	0.0292841648590022	27	positive	2	2_negative
3	negative	demonstrator	1	34	4	19	35	0.0292841648590022	27	positive	2	2_negative
4	positive	cup.before	NA	NA	NA	NA	NA	0.0143288084464555	19	positive	2	2_positive
4	positive	cup.after	0	30	9	0	30	0.0143288084464555	19	positive	2	2_positive
4	positive	demonstrator	0	30	6	0	30	0.0143288084464555	19	positive	2	2_positive
4	negative	cup.before	NA	NA	NA	NA	NA	0.0143288084464555	19	positive	2	2_negative
4	negative	cup.after	NA	NA	NA	NA	NA	0.0143288084464555	19	positive	2	2_negative
4	negative	demonstrator	NA	NA	NA	NA	NA	0.0143288084464555	19	positive	2	2_negative
5	positive	cup.before	0	30	1	0	30	0.0228758169934641	42	positive	2	2_positive
5	positive	cup.after	0	30	4	0	30	0.0228758169934641	42	positive	2	2_positive
5	positive	demonstrator	0	45	2	0	45	0.0228758169934641	42	positive	2	2_positive
5	negative	cup.before	7	14	4	1	25	0.0228758169934641	42	positive	2	2_negative
5	negative	cup.after	12	10	6	2	30	0.0228758169934641	42	positive	2	2_negative
5	negative	demonstrator	8	15	8	1	31	0.0228758169934641	42	positive	2	2_negative
7	positive	cup.before	4	22	14	3	30	0.00495750708215297	7	positive	1	1_positive
7	positive	cup.after	8	12	6	4	30	0.00495750708215297	7	positive	1	1_positive
7	positive	demonstrator	9	12	6	3	29	0.00495750708215297	7	positive	1	1_positive
7	negative	cup.before	4	10	2	0	14	0.00495750708215297	7	positive	1	1_negative
7	negative	cup.after	6	4	1	0	10	0.00495750708215297	7	positive	1	1_negative
7	negative	demonstrator	3	13	10	0	19	0.00495750708215297	7	positive	1	1_negative
9	positive	cup.before	0	14	7	0	14	0.00397877984084881	3	negative	1	1_positive
9	positive	cup.after	0	9	5	0	14	0.00397877984084881	3	negative	1	1_positive
9	positive	demonstrator	2	19	16	0	26	0.00397877984084881	3	negative	1	1_positive
9	negative	cup.before	NA	NA	NA	NA	NA	0.00397877984084881	3	negative	1	1_negative
9	negative	cup.after	NA	NA	NA	NA	NA	0.00397877984084881	3	negative	1	1_negative
9	negative	demonstrator	NA	NA	NA	NA	NA	0.00397877984084881	3	negative	1	1_negative
12	positive	cup.before	0	26	8	0	26	0.0702560735390676	107	negative	2	2_positive
12	positive	cup.after	1	16	2	0	30	0.0702560735390676	107	negative	2	2_positive
12	positive	demonstrator	0	45	23	4	45	0.0702560735390676	107	negative	2	2_positive
12	negative	cup.before	11	9	NA	1	24	0.0702560735390676	107	negative	2	2_negative
12	negative	cup.after	3	7	NA	2	30	0.0702560735390676	107	negative	2	2_negative
12	negative	demonstrator	18	24	NA	12	45	0.0702560735390676	107	negative	2	2_negative
15	positive	cup.before	7	3	1	0	28	0.0501981505944518	76	positive	12	12_positive
15	positive	cup.after	8	2	0	0	26	0.0501981505944518	76	positive	12	12_positive
15	positive	demonstrator	6	0	0	0	40	0.0501981505944518	76	positive	12	12_positive
15	negative	cup.before	1	3	2	0	30	0.0501981505944518	76	positive	12	12_negative
15	negative	cup.after	0	14	6	0	17	0.0501981505944518	76	positive	12	12_negative
15	negative	demonstrator	1	28	10	1	40	0.0501981505944518	76	positive	12	12_negative
16	positive	cup.before	3	12	6	2	25	0	0	negative	12	12_positive
16	positive	cup.after	0	2	0	0	26	0	0	negative	12	12_positive
16	positive	demonstrator	2	35	2	0	45	0	0	negative	12	12_positive
16	negative	cup.before	8	14	8	0	30	0	0	negative	12	12_negative
16	negative	cup.after	9	10	8	1	30	0	0	negative	12	12_negative
16	negative	demonstrator	11	20	12	2	45	0	0	negative	12	12_negative
17	positive	cup.before	0	30	5	0	30	0.00147983721790603	4	negative	11	11_positive
17	positive	cup.after	2	23	6	3	30	0.00147983721790603	4	negative	11	11_positive
17	positive	demonstrator	0	45	9	5	45	0.00147983721790603	4	negative	11	11_positive
17	negative	cup.before	0	30	4	0	30	0.00147983721790603	4	negative	11	11_negative
17	negative	cup.after	1	15	5	2	30	0.00147983721790603	4	negative	11	11_negative
17	negative	demonstrator	0	45	10	8	45	0.00147983721790603	4	negative	11	11_negative
19	positive	cup.before	1	29	15	0	30	0.00656455142231947	6	negative	15	15_positive
19	positive	cup.after	3	10	7	0	20	0.00656455142231947	6	negative	15	15_positive
19	positive	demonstrator	4	19	11	0	28	0.00656455142231947	6	negative	15	15_positive
19	negative	cup.before	14	16	7	0	30	0.00656455142231947	6	negative	15	15_negative
19	negative	cup.after	3	24	7	0	30	0.00656455142231947	6	negative	15	15_negative
19	negative	demonstrator	8	31	14	3	45	0.00656455142231947	6	negative	15	15_negative
20	positive	cup.before	10	4	5	0	14	0.0415254237288136	49	negative	8	8_positive
20	positive	cup.after	13	16	5	2	30	0.0415254237288136	49	negative	8	8_positive
20	positive	demonstrator	13	14	6	4	30	0.0415254237288136	49	negative	8	8_positive
20	negative	cup.before	5	15	4	0	21	0.0415254237288136	49	negative	8	8_negative
20	negative	cup.after	4	9	7	0	13	0.0415254237288136	49	negative	8	8_negative
20	negative	demonstrator	6	13	6	0	28	0.0415254237288136	49	negative	8	8_negative
21	positive	cup.before	4	8	3	0	12	0.0125104253544621	15	negative	8	8_positive
21	positive	cup.after	6	11	2	2	20	0.0125104253544621	15	negative	8	8_positive
21	positive	demonstrator	10	20	8	2	36	0.0125104253544621	15	negative	8	8_positive
21	negative	cup.before	0	30	18	0	30	0.0125104253544621	15	negative	8	8_negative
21	negative	cup.after	0	30	23	0	30	0.0125104253544621	15	negative	8	8_negative
21	negative	demonstrator	0	45	23	0	45	0.0125104253544621	15	negative	8	8_negative
22	positive	cup.before	14	15	5	0	30	0.00188146754468485	2	negative	15	15_positive
22	positive	cup.after	16	11	3	0	30	0.00188146754468485	2	negative	15	15_positive
22	positive	demonstrator	22	18	9	3	45	0.00188146754468485	2	negative	15	15_positive
22	negative	cup.before	0	30	3	0	30	0.00188146754468485	2	negative	15	15_negative
22	negative	cup.after	1	22	11	1	30	0.00188146754468485	2	negative	15	15_negative
22	negative	demonstrator	0	45	15	0	45	0.00188146754468485	2	negative	15	15_negative
24	positive	cup.before	5	2	1	0	10	0.0187125748502994	25	positive	8	8_positive
24	positive	cup.after	0	30	12	0	30	0.0187125748502994	25	positive	8	8_positive
24	positive	demonstrator	1	20	5	0	39	0.0187125748502994	25	positive	8	8_positive
24	negative	cup.before	NA	NA	NA	NA	NA	0.0187125748502994	25	positive	8	8_negative
24	negative	cup.after	NA	NA	NA	NA	NA	0.0187125748502994	25	positive	8	8_negative
24	negative	demonstrator	NA	NA	NA	NA	NA	0.0187125748502994	25	positive	8	8_negative
25	positive	cup.before	4	4	2	0	11	0.00262123197903014	2	positive	15	15_positive
25	positive	cup.after	0	1	1	0	3	0.00262123197903014	2	positive	15	15_positive
25	positive	demonstrator	8	4	3	0	24	0.00262123197903014	2	positive	15	15_positive
25	negative	cup.before	21	9	7	0	30	0.00262123197903014	2	positive	15	15_negative
25	negative	cup.after	19	11	9	0	30	0.00262123197903014	2	positive	15	15_negative
25	negative	demonstrator	29	11	7	0	40	0.00262123197903014	2	positive	15	15_negative

## Sheet: demonstrators' behaviours
BirdID	prey.type	time.eating	time.total	beak.wiping	beak.wiping.secs	head.shakes
1	palatable	77	87	11	4	5
1	unpalatable	49	59	49	18	6
2	palatable	28	38	4	1	1
2	unpalatable	6	16	20	4	5
8	palatable	51	61	7	2	0
8	unpalatable	114	115	34	8	17
11	palatable	57	67	0	0	0
11	unpalatable	55	65	49	12	18
12	palatable	123	133	17	5	0
12	unpalatable	46	56	107	23	20
15	palatable	160	170	0	0	0
15	unpalatable	89	99	69	16	27

## Sheet: cup choice
BirdID	Weight	info_type	same_choice	using_info	first_test	association	demonstratorID	demonstrator_video	time_choosing
1	9.7	positive	1	1	positive	0	2	2_positive	41
1	9.7	negative	NA	NA	positive	0	2	2_negative	NA
3	10.6	positive	0	0	positive	0.0292841648590022	2	2_positive	90
3	10.6	negative	0	1	positive	0.0292841648590022	2	2_negative	45
4	10.3	positive	NA	NA	positive	0.0143288084464555	2	2_positive	NA
4	10.3	negative	1	0	positive	0.0143288084464555	2	2_negative	851
5	10.6	positive	0	0	positive	0.0228758169934641	2	2_positive	319
5	10.6	negative	0	1	positive	0.0228758169934641	2	2_negative	116
7	10.9	positive	1	1	positive	0.00495750708215297	1	1_positive	25
7	10.9	negative	1	0	positive	0.00495750708215297	1	1_negative	101
8	11.2	positive	NA	NA	negative	0.00167926112510495	1	1_positive	NA
8	11.2	negative	0	1	negative	0.00167926112510495	1	1_negative	1129
9	10.9	positive	1	1	negative	0.00397877984084881	1	1_positive	290
9	10.9	negative	0	1	negative	0.00397877984084881	1	1_negative	69
10	11.1	positive	0	0	positive	0.010586319218241	1	1_positive	67
10	11.1	negative	0	1	positive	0.010586319218241	1	1_negative	17
12	10.2	positive	0	0	negative	0.0702560735390676	2	2_positive	43
12	10.2	negative	1	0	negative	0.0702560735390676	2	2_negative	243
13	9.9	positive	1	1	negative	0.00992063492063492	8	8_positive	11
13	9.9	negative	1	0	negative	0.00992063492063492	8	8_negative	139
14	11.5	positive	0	0	positive	0.112215320910973	11	11_positive	48
14	11.5	negative	0	1	positive	0.112215320910973	11	11_negative	108
15	11.2	positive	1	1	positive	0.0501981505944518	12	12_positive	80
15	11.2	negative	0	1	positive	0.0501981505944518	12	12_negative	42
16	10.2	positive	1	1	negative	0	12	12_positive	36
16	10.2	negative	0	1	negative	0	12	12_negative	7
17	11.2	positive	1	1	negative	0.00147983721790603	11	11_positive	72
17	11.2	negative	1	0	negative	0.00147983721790603	11	11_negative	154
18	10.2	positive	0	0	positive	0.0664010624169987	1	1_positive	94
18	10.2	negative	1	0	positive	0.0664010624169987	1	1_negative	98
19	10.3	positive	0	0	negative	0.00656455142231947	15	15_positive	151
19	10.3	negative	1	0	negative	0.00656455142231947	15	15_negative	24
20	10.4	positive	1	1	negative	0.0415254237288136	8	8_positive	35
20	10.4	negative	0	1	negative	0.0415254237288136	8	8_negative	61
21	11	positive	1	1	negative	0.0125104253544621	8	8_positive	10
21	11	negative	0	1	negative	0.0125104253544621	8	8_negative	30
22	10	positive	0	0	negative	0.00188146754468485	15	15_positive	25
22	10	negative	0	1	negative	0.00188146754468485	15	15_negative	35
23	10	positive	0	0	negative	0.00330760749724366	15	15_positive	71
23	10	negative	0	1	negative	0.00330760749724366	15	15_negative	35
24	11.2	positive	1	1	positive	0.0187125748502994	8	8_positive	9
24	11.2	negative	1	0	positive	0.0187125748502994	8	8_negative	66
25	10.5	positive	0	0	positive	0.00262123197903014	15	15_positive	320
25	10.5	negative	1	0	positive	0.00262123197903014	15	15_negative	95
